# Supplementary material
Source: PubMed Central journal article supplement (PMC3180801)
Supplement: supp_tpc.111.088005_Hasebe_Supplemental_Movie_Legends_Final.pdf [file supp_tpc.111.088005_Hasebe_Supplemental_Movie_Legends_Final.pdf]

**Supplemental Movie 1. Formation of Chloronema Apical Cells in an Excised leaf.**

An excised leaf was incubated on BCD medium under continuous white light at 25°C.

Images were taken at 24-min intervals for 48 h. Time after excision is indicated at the upper right corner of the movie. Selected frames (0, 24, 36, and 48 h) are shown in

Figure 1A. Bar = 100  $\mu\text{m}$ .
